# Supplementary material for: Upcycling of spent graphite and iron housing from waste lithium-ion batteries for fabricating cost-effective high-capacity anodes
Source: Royal Society of Chemistry journal article supplement (doi:10.1039/d3gc01858j), 2023-01-01
Supplement: d3gc01858j1.pdf [file d3gc01858j1.pdf]

## Supplementary Information

# Upcycling of spent graphite and iron housing from waste lithium-ion batteries for fabricating cost-effective high-capacity anode

*Seokju Maeng*<sup>a, †</sup>, *Jaeyun Ha*<sup>a</sup>, *Jinhee Lee*<sup>a</sup>, *Yong-Tae Kim*<sup>b, \*</sup>, *Jinsub Choi*<sup>a, \*</sup>

<sup>a</sup> Department of Chemistry and Chemical Engineering, Inha University, 22212, Incheon, Republic of Korea

<sup>b</sup> Department of Chemical and Biomolecular Engineering, Chonnam National University, 59626, Yeosu, Republic of Korea

\*To whom correspondence should be addressed.

Tel.: +82-32-860-7476

e-mail: yongtaekim@jnu.ac.kr, jinsub@inha.ac.kr

## Table of contents

### Supporting Figures and Tables

|                                                                                            |      |
|--------------------------------------------------------------------------------------------|------|
| <b>S1.1 Degree of degradation of pristine and spent graphite.</b>                          | p.3  |
| Figure S1                                                                                  |      |
| <b>S1.2 Iron housing in LIBs.</b>                                                          | p.4  |
| Figure S2                                                                                  |      |
| <b>S1.3 Morphological characterizations of F-SGO before heat treatment.</b>                | p.5  |
| Figure S3                                                                                  |      |
| Table S1                                                                                   |      |
| <b>S1.4 Physical characterizations of F-SGO before and after heat treatment.</b>           | p.7  |
| Figure S4                                                                                  |      |
| Figure S5                                                                                  |      |
| Figure S6                                                                                  |      |
| <b>S1.5 Volume expansion of the anode before cycling and after 100<sup>th</sup> cycle.</b> | p.10 |
| Figure S7                                                                                  |      |
| <b>S1.6 Physical characterizations of the composite.</b>                                   | p.11 |
| Table S2                                                                                   |      |
| Table S3                                                                                   |      |
| Table S4                                                                                   |      |

## Supporting Figures and Tables

### S1.1. Degree of degradation of pristine and spent graphite

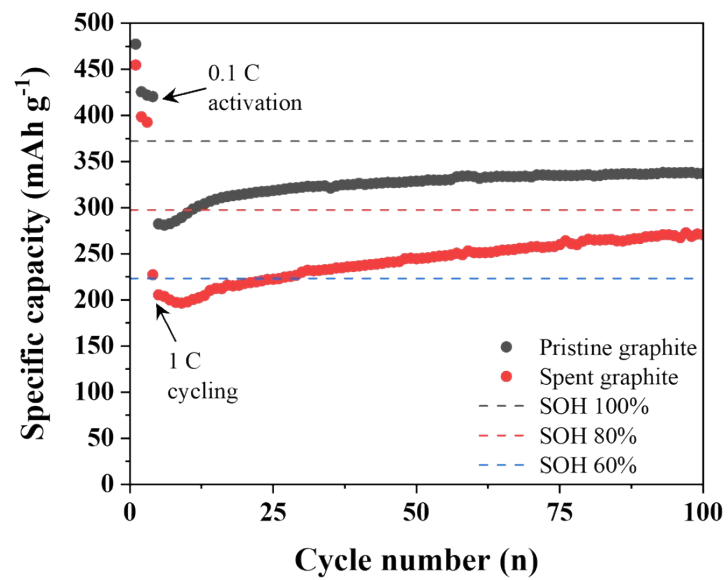

**Figure S1.** Discharge profile of coin type pristine graphite (PG) and spent graphite (SG) half-cell.

## S1.2. Iron housing of LIBs

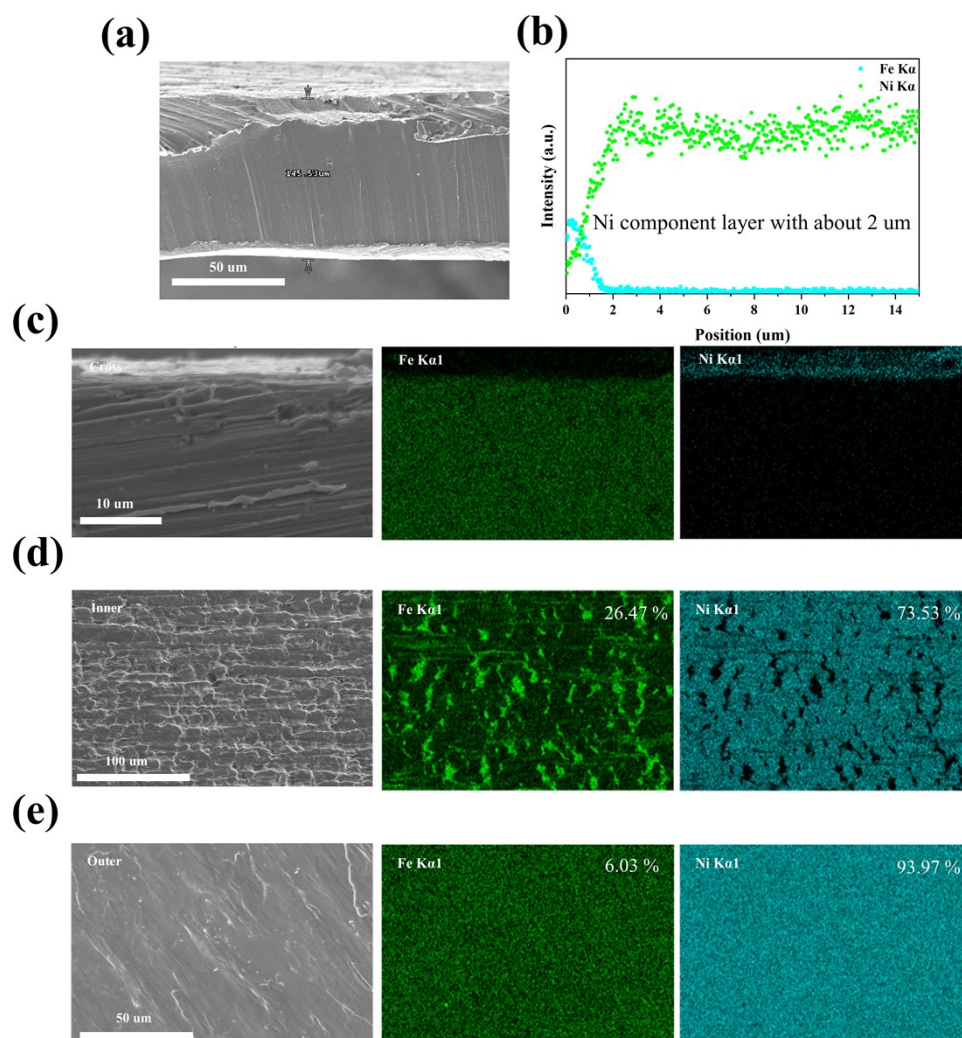

**Figure S2.** (a) Cross-sectional SEM image of the iron housing and (b) corresponding EDX line profile. SEM and corresponding EDX mapping images of (c) cross-, (d) inner-, and (e) outer-sections of the iron housing.

### S1.3. Morphological characterization of F-SGO before heat treatment

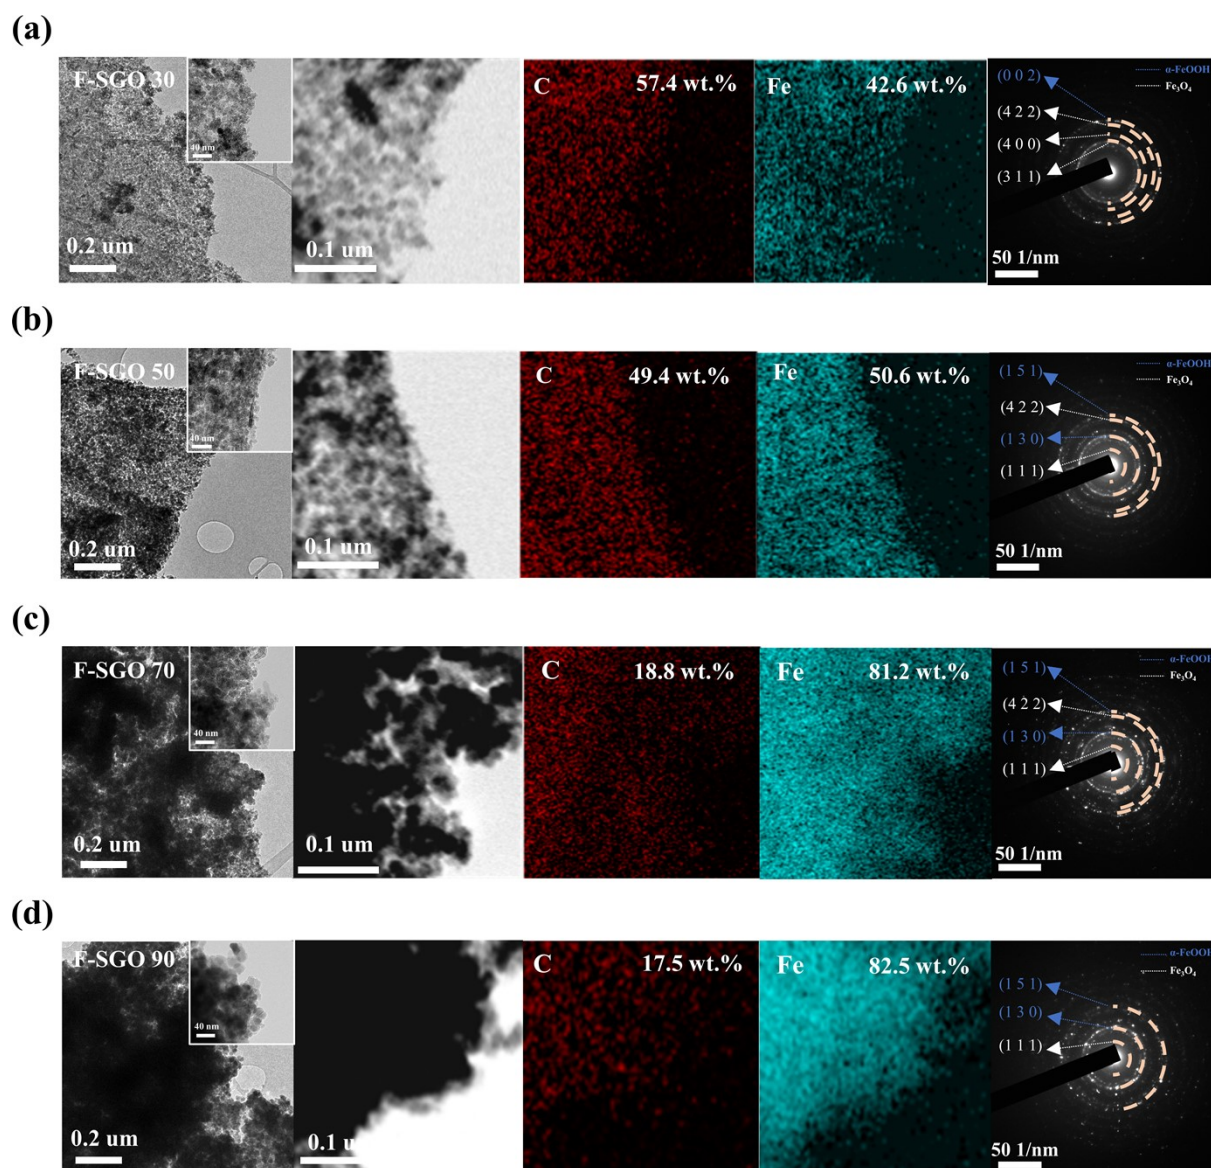

**Figure S3.** HR-TEM and corresponding EDX mapping images and SAED patterns of (a) F-SGO 30, (b) F-SGO 50, (c) F-SGO 70, and (d) F-SGO 90.

**Table S1.** Element composition of F-SGO 30 detected by TEM-EDX.

| <b>Element</b> | <b>Weight%</b> | <b>Atomic%</b> |
|----------------|----------------|----------------|
| C              | 33.01          | 53.93          |
| O              | 25.68          | 31.50          |
| Na             | 0.00           | 0.00           |
| S              | 0.11           | 0.07           |
| Cl             | 0.07           | 0.04           |
| K              | 0.00           | 0.00           |
| Mn             | 0.38           | 0.14           |
| Fe             | 40.76          | 14.32          |
| Ni             | 0.00           | 0.00           |
| Total          | 100.00         | 100.00         |

## S1.4. Physical characterizations of F-SGO before and after heat treatment

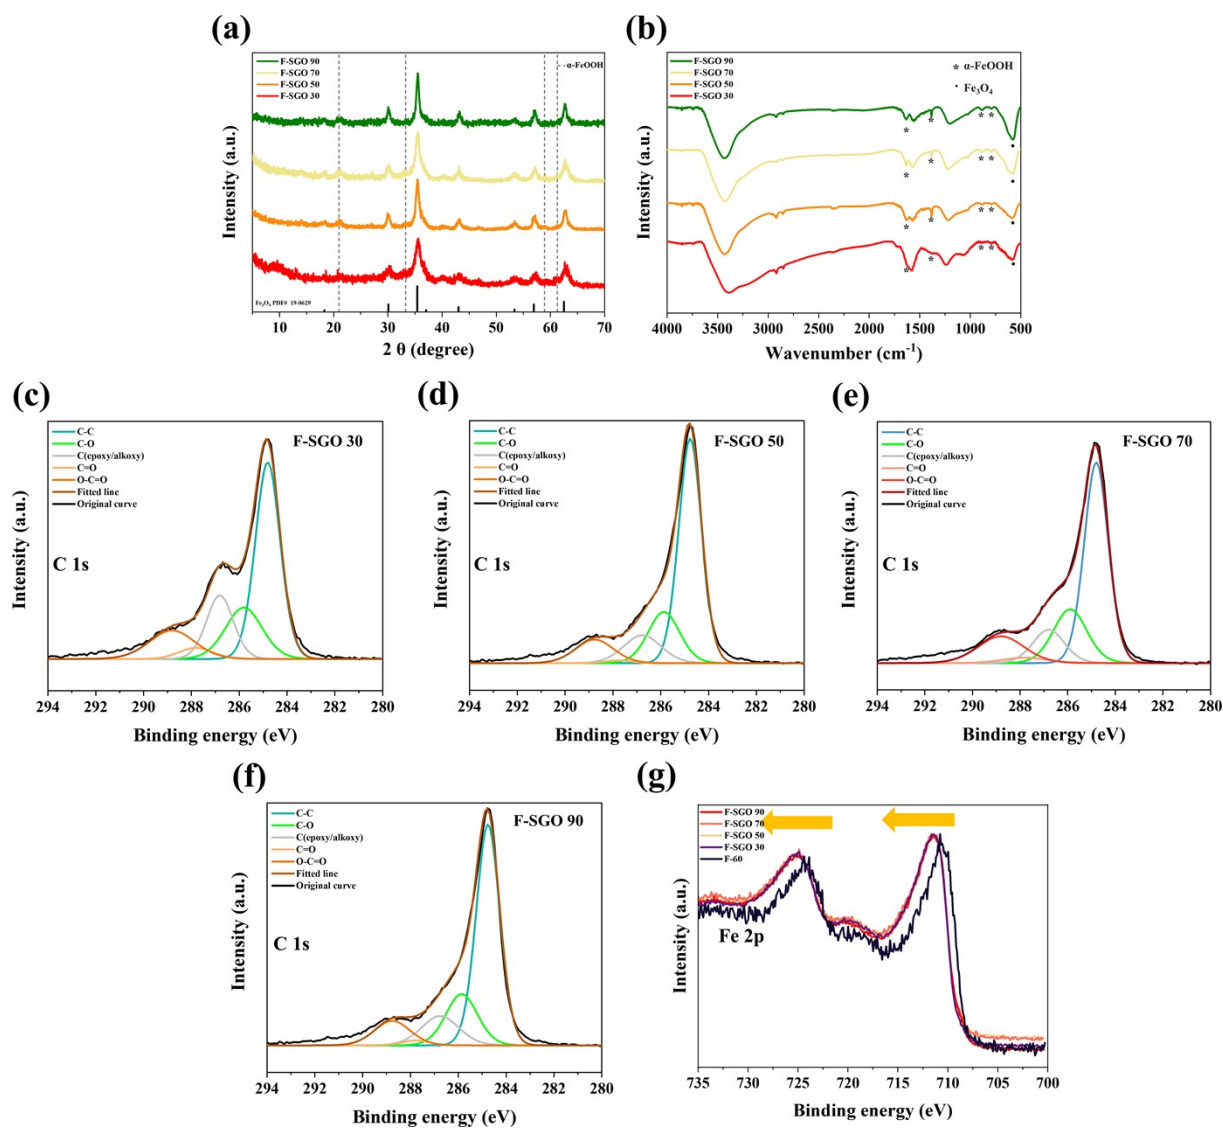

**Figure S4.** (a) XRD patterns, (b) FT-IR spectra, and C 1s XPS analysis of (c) F-SGO 30, (d) F-SGO 50, (e) F-SGO 70, and (f) F-SGO 90. (g) Fe 2p XPS profiles of F-SGO30, 50, 70, and 90.

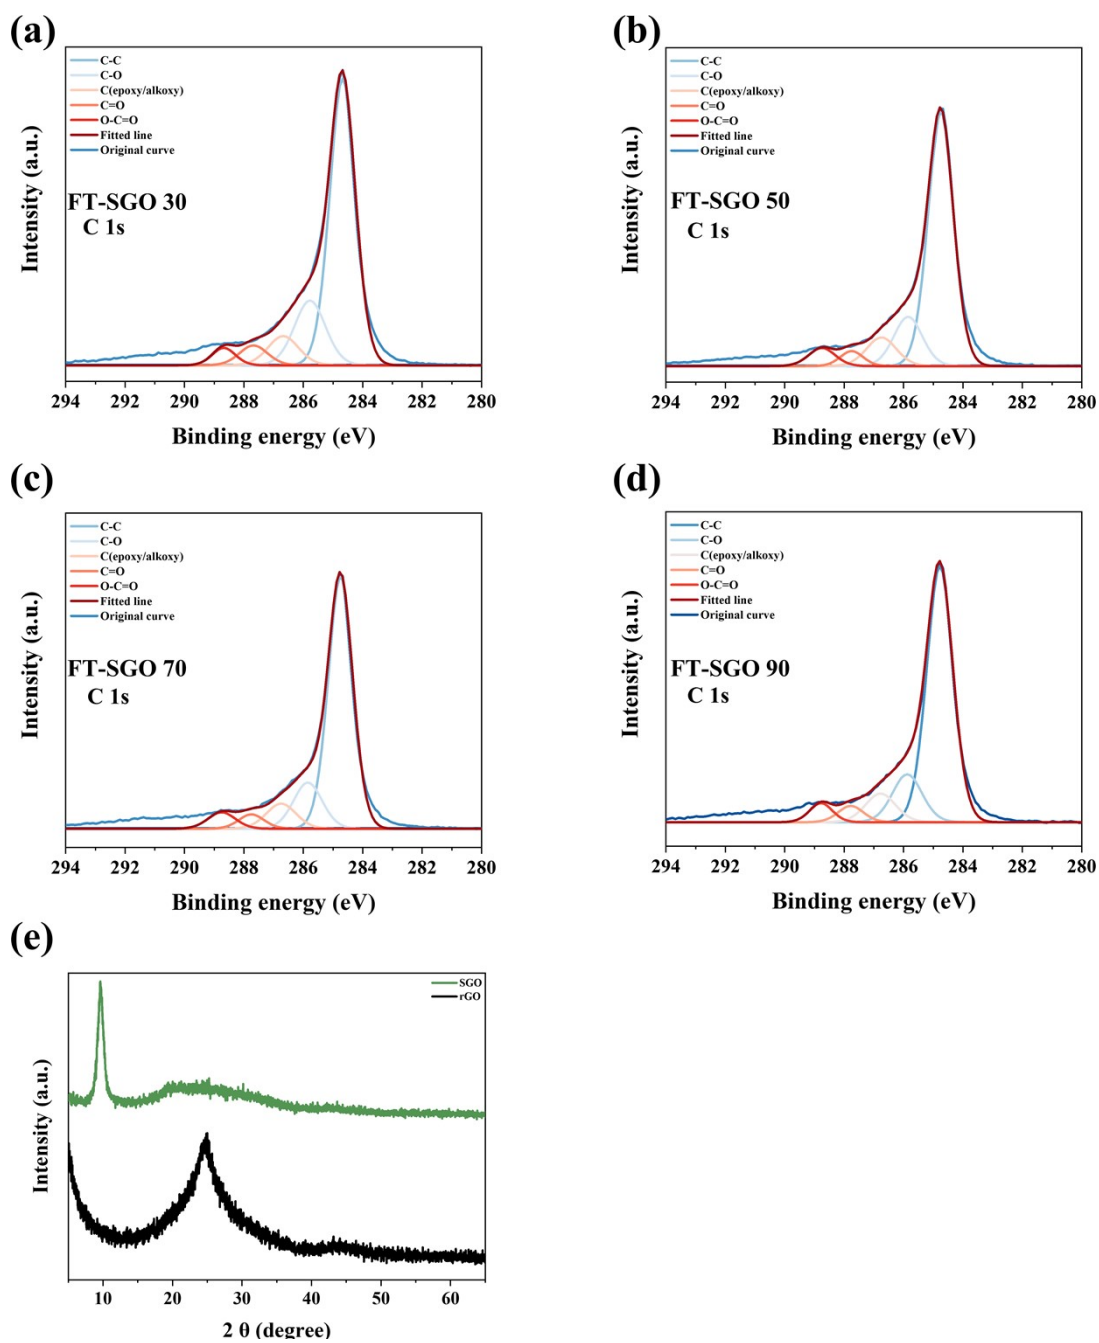

**Figure S5.** C 1s XPS analysis of (a) FT-SGO 30, (b) FT-SGO 50, (c) FT-SGO 70, and (d) FT-SGO 90. (e) XRD patterns of SGO (green) and rGO (black).



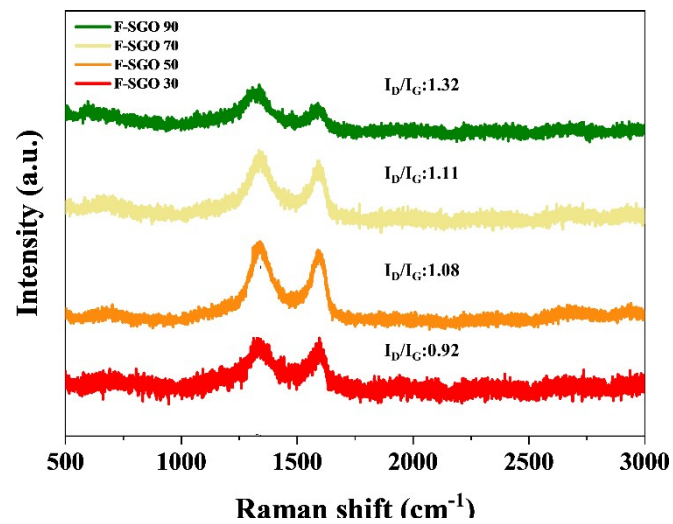

**Figure S6.** Raman spectra of F-SGO at different reaction times.

### S1.5. Volume expansion of anode before cycling and after 100<sup>th</sup> cycle

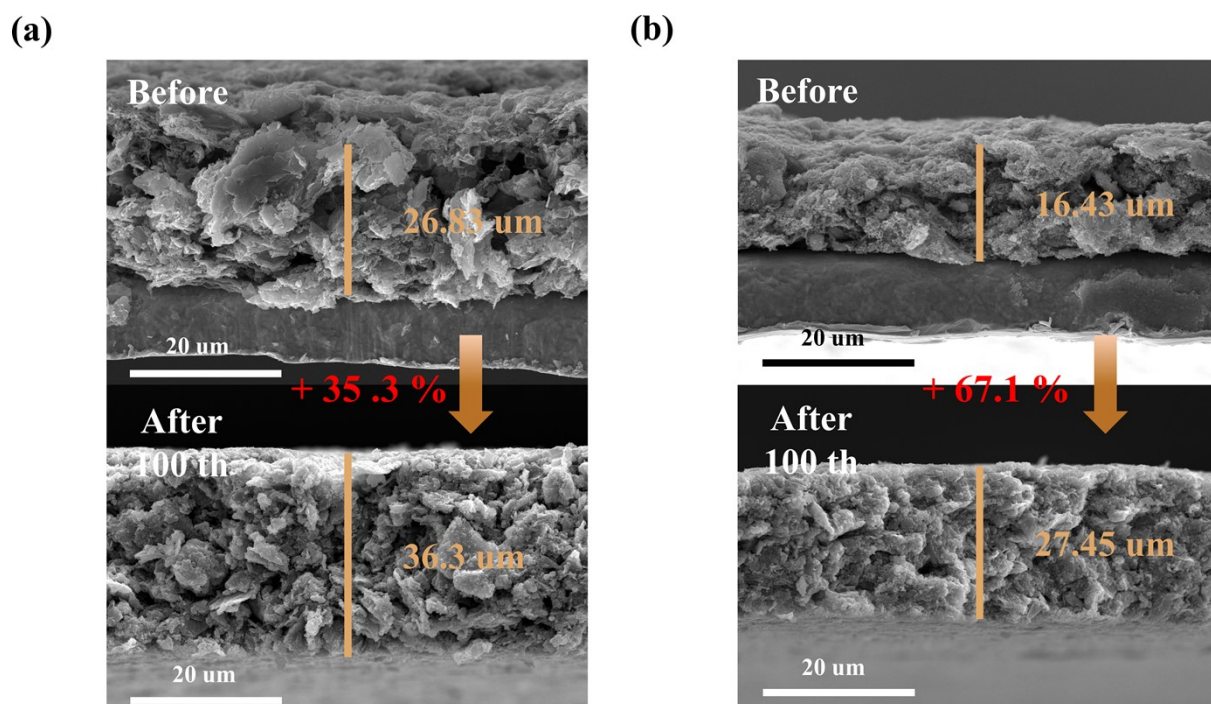

**Figure S7.** SEM images before and after 100th cycle at a current density of  $1 \text{ A g}^{-1}$  for (a) FT-SGO 30 and (b) FT-SGO 90.

## S1.6. Physical characterizations of FT-SGO

**Table S2.** Zeta potentials of FT and GO

| Zeta potential (mV) |        |        |        |         |
|---------------------|--------|--------|--------|---------|
|                     | 1st    | 2nd    | 3rd    | Average |
| <b>FT</b>           | 55.09  | 54.77  | 52.98  | 54.28   |
| <b>SGO</b>          | -40.37 | -38.58 | -41.09 | -40.01  |

**Table S3.** Electrochemical impedance spectroscopy (EIS) data for FT-SGO anode at different reaction times

|                              |      | 6030_450 | 6050_450 | 6070_450 | 6090_450 |
|------------------------------|------|----------|----------|----------|----------|
| <b>R<sub>s</sub>(Ω)</b>      | 0 th | 4.58     | 5.29     | 6.853    | 6.49     |
| <b>R<sub>ct</sub>(R) (Ω)</b> | 0 th | 37.45    | 51.618   | 73.16    | 76.85    |

**Table S4.** Economic analysis of the upcycling process and graphite-silicon monoxide with a 9:1 weight ratio

| Materials                      | Conditions                                                                                                                 | Unit price                       | Cost           | Reference                                                                                                                                                   |
|--------------------------------|----------------------------------------------------------------------------------------------------------------------------|----------------------------------|----------------|-------------------------------------------------------------------------------------------------------------------------------------------------------------|
| H <sub>2</sub> SO <sub>4</sub> | 8.42 mL                                                                                                                    | 0.01<br>(\$ mL <sup>-1</sup> )   | 0.0841<br>(\$) | <a href="http://www.daejungchem.co.kr/02_product/search/?search_value=7664-93-9">http://www.daejungchem.co.kr/02_product/search/?search_value=7664-93-9</a> |
| H <sub>2</sub> O <sub>2</sub>  | 2.26 mL                                                                                                                    | 0.0076<br>(\$ mL <sup>-1</sup> ) | 0.0171<br>(\$) | <a href="http://www.daejungchem.co.kr/02_product/search/?search_value=7664-93-9">http://www.daejungchem.co.kr/02_product/search/?search_value=7664-93-9</a> |
| KMnO <sub>4</sub>              | 1.6 g                                                                                                                      | 0.0118<br>(\$ g <sup>-1</sup> )  | 0.0188<br>(\$) | <a href="http://www.daejungchem.co.kr/02_product/search/?search_value=7664-93-9">http://www.daejungchem.co.kr/02_product/search/?search_value=7664-93-9</a> |
| NaCl                           | 3 g × 1 g product/0.4 g per rep                                                                                            | 0.0144<br>(\$ g <sup>-1</sup> )  | 0.108<br>(\$)  | <a href="https://www.junsei.co.jp/product_search/search_seihin_result_e.html">https://www.junsei.co.jp/product_search/search_seihin_result_e.html</a>       |
| Electricity price              | 2.5 V × 0.18 A × 0.5 h × 1 g product/0.4 g per rep (potentiostat) + 0.164 kWh (ultrasonication) + 0.355 kWh (tube furnace) | 0.1219<br>(\$/KW h)              | 0.0632<br>(\$) | <a href="https://doi.org/10.1016/j.jpowsour.2020.229163">https://doi.org/10.1016/j.jpowsour.2020.229163</a>                                                 |
| Argon price                    | 25.3 L (including purification and synthesis)                                                                              | 0.009<br>(\$ L <sup>-1</sup> )   | 0.227<br>(\$)  | <a href="http://www.higas.co.kr/">http://www.higas.co.kr/</a>                                                                                               |
| Graphite anode                 | 0.753 g                                                                                                                    | 0.2378<br>(\$ g <sup>-1</sup> )  | 0.179<br>(\$)  | <a href="https://www.sigmaaldrich.com/KR/ko/product/aldrich/907154">https://www.sigmaaldrich.com/KR/ko/product/aldrich/907154</a>                           |
| SiO anode                      | 0.247 g                                                                                                                    | 6.593<br>(\$ g <sup>-1</sup> )   | 1.628<br>(\$)  | <a href="https://www.sigmaaldrich.com/KR/ko/product/aldrich/336823">https://www.sigmaaldrich.com/KR/ko/product/aldrich/336823</a>                           |

\* All price calculations are based on the retail price and 1 g of product.

\* Most chemical prices are in Korean Won and all costs are converted to US Dollars using the exchange rate as of February 10, 2023.

\* Theoretical capacity calculation was based on the following equation:

$$774 \text{ mAh } g^{-1} \times 0.336 + 924 \text{ mAh } g^{-1} \times 0.664 = 873.6 \text{ mAh } g^{-1}$$

- 774 and 924  $\text{mAh } g^{-1}$  represent the theoretical capacities of reduced graphene oxide and  $\text{Fe}_3\text{O}_4$ , respectively.
- The weight ratios of reduced graphene oxide and  $\text{Fe}_3\text{O}_4$  based on TGA were 0.336 and 0.664, respectively.
